# Supplementary material for: The paradox of retained genetic diversity of Hippocampus guttulatus in the face of demographic decline
Source: PubMed Central journal article supplement (PMC8129090; doi:10.1038/s41598-021-89708-0), 2021-05-17
Supplement: 41598_2021_89708_MOESM1_ESM.pdf [file 41598_2021_89708_MOESM1_ESM.pdf]

**Electronic supplement Table 1. Microsatellite loci used in the present study.**

**The paradox of retained genetic diversity of *Hippocampus guttulatus* in the face of demographic decline**

**Rupert Stacy**

**Jorge Palma**

**Miguel Correia**

**José Pedro Andrade**

**Rita Castilho**

**Corresponding author: [rcastil@ualg.pt](mailto:rcastil@ualg.pt)**

Electronic supplement Table 1. Microsatellite loci used in the present study.

| <b>Locus</b> | <b>Reference</b> | <b>Genbank accession number</b> | <b>Primer forward (5' -&gt; 3')</b> | <b>Primer reverse (3' -&gt; 5')</b> | <b>Repeat structure</b>    |
|--------------|------------------|---------------------------------|-------------------------------------|-------------------------------------|----------------------------|
| Hgut4        | Vliet 2009       | GQ148733                        | GCCGCATACACTGGACCGCATC              | TGCGAGCTACGTGAGGGAGAACATC           | (GATA)25                   |
| Hgut6        | Vliet 2009       | GQ148735                        | AGAGACGCCAGTCCACACTGAA              | GAGGAGCAGAATGGTGGGAAGGGACA          | (ATAG)28                   |
| Hgut9        | Vliet 2009       | GQ148738                        | AATCACTTCTCAATCAACCAATCT            | ATGTGATCAATGAAGCCCAAAC              | (ATAG)17                   |
| Hhip1        | Vliet 2009       | GQ148720                        | TGCAACAGGACACCCAAGGTAGCA            | ATGAAAAAGCCAAAGCGTGGCGG             | (ATCT)42                   |
| Hhip3        | Vliet 2009       | GQ148722                        | TGATGTTGCGTCTAAACAAGTGACA           | GCCACTCTAAAATGTGCCTCAGAAC           | (TCTA)22TCCA(TCTA)9        |
| Hhip4        | Vliet 2009       | GQ148723                        | CATGTAAACAACTCCAGGCATCG             | AGGGTGATTCCATTTTATTGCGGG            | (AGAT)30                   |
| Hhip9        | Vliet 2009       | GQ148728                        | TGACACATGCTGGCTATGTCCGT             | GCCCCTGATTAACCTTGAACAACCTC          | (GA)20TACAG(TAGC)4(TAGA)22 |
| Hgu-USC1     | Pardo 2006       | DQ986275                        | GGATTTGACCCATTTTCGATG               | GTGTATTTGGCGCTGTTTGA                | (TG)9                      |
| Hgu-USC5     | Pardo 2006       | DQ986279                        | GTGTGTTGGATTGCTGGATG                | ATGACAAGTGCCTGAGCGTA                | (TGCG)4(TG)6 C(GT)4A(TG)3  |
| Hgu-USC6     | Pardo 2006       | DQ986280                        | CAGTCCCTGAAGCTATTCCTGT              | AAGGACTTTGTGTTCACTTGC               | (GT)12                     |
| Hgu-USC7     | Pardo 2006       | DQ986281                        | CAGAGCAGTGTAACCCATTTCG              | TTTCACCGTCCATCTTCCTC                | (GA)8A(AG)10               |
| Hgu-USC9     | Pardo 2006       | DQ986283                        | TTGCAGAATGTGGCTGGATA                | AGTGGAGGCTGACAGGGTAA                | (TG)14                     |
